1 Global Stroke Burden from Metabolic Risks Across Demographics: Findings from the  
2 2021 Global Burden of Disease Study

3

4 Song Xue<sup>1,2</sup>, Guoqing Wu<sup>2\*</sup>

5

6 <sup>1</sup> School of Minerals Processing and Bioengineering, Central South University,  
7 Changsha, Hunan 410011, China.

8 <sup>2</sup> Affiliated Hospital of Jiangxi University of Traditional Chinese Medicine, Nanchang,  
9 Jiangxi 330006, China

10

11 \* Corresponding author: [13970986129@163.com](mailto:13970986129@163.com)

12 Song Xue: Ph. D. Candidates, [xuesong2022@csu.edu.cn](mailto:xuesong2022@csu.edu.cn), School of Minerals  
13 Processing and Bioengineering, Central South University, Changsha, Hunan 410011,  
14 China.

15 Guoqing Wu: Master's degree, [13970986129@163.com](mailto:13970986129@163.com), Affiliated Hospital of Jiangxi  
16 University of Traditional Chinese Medicine, Nanchang, Jiangxi 330006, China

17

18

## Abstract

19 **Background:** Stroke is the second leading cause of death and the primary cause of  
20 disability worldwide. Metabolic risks are major contributors to stroke. The global  
21 trends in metabolic risk-related stroke from 1990 to 2019, and the differences in  
22 mortality and DALYs across various demographic factors, remain unclear.

23 **Methods:** All analyses were based on rates derived from the GBD2021 results  
24 (<https://vizhub.healthdata.org/gbd-results/>). Data were stratified by gender, region,  
25 and age. Joinpoint software was used to perform regression analysis of the average  
26 annual percent change (AAPC) and its 95% confidence interval to analyze trends  
27 from 1990 to 2019. Excel, PowerPoint, and R software were used for plotting and  
28 analysis, with  $p < 0.05$  considered statistically significant.

29 **Results:** From 1990 to 2019, the average annual percent change (AAPC) for  
30 age-standardized rates (ASR) of DALYs was -1.70% (-1.81%, -1.58%), and for  
31 mortality, the AAPC was -1.57% (-1.68%, -1.46%). As the SDI increased, both the  
32 ASR of DALYs and mortality in 2019 showed a significant decline. The AAPC from  
33 1990 to 2019 also exhibited a downward trend with increasing SDI levels. The  
34 DALYs and mortality rates of metabolic risk-related stroke predominantly affected  
35 individuals aged 75 and above, with a lesser impact on those under 55. For both  
36 genders, the 10-55 and 50-74 age groups had the highest DALYs and mortality rates  
37 due to metabolic-related intracerebral hemorrhage. For those aged 75-84 and over 85,  
38 ischemic stroke was the leading subtype of metabolic-related stroke contributing to  
39 DALYs and mortality rates.

40 **Conclusion:** This is the first retrospective study on metabolic risk-related stroke on a  
41 global scale, summarizing its temporal trends and demographic distribution  
42 characteristics. Effective public health strategies are needed to address these  
43 disparities and continue reducing the global burden of metabolic risk-related strokes.

44

45 **Introduction:**

46 Stroke is the second leading cause of death and the primary cause of disability  
47 worldwide.<sup>1</sup> Over the past three decades, the global burden of stroke has seemingly  
48 decreased, primarily reflecting declines in high-income countries.<sup>2</sup> In contrast, the  
49 burden of stroke has rapidly increased in low- and middle-income countries,<sup>3</sup> with  
50 variations in age and gender compositions contributing to differences in stroke burden  
51 across countries.<sup>4</sup>

52 Metabolic factors are key contributors to stroke risk.<sup>5</sup> Elevated fasting blood  
53 glucose levels,<sup>6</sup> high low-density lipoprotein cholesterol,<sup>7</sup> high systolic blood  
54 pressure,<sup>8</sup> elevated body mass index,<sup>9</sup> low bone mineral density,<sup>10</sup> and impaired  
55 renal function<sup>11</sup> significantly increase stroke risk. However, comprehensive  
56 epidemiological information on stroke burden related to metabolic risk factors  
57 remains limited.

58 In this study, we extracted epidemiological data on stroke related to metabolic  
59 risks from the Global Burden of Disease (GBD) 2021 study. The GBD study is a  
60 collaborative research project between the World Health Organization (WHO) and  
61 many academic institutions that aims to assess the burden of disease and injury at the  
62 global, regional and national levels.<sup>12</sup> The data of GBD 2021 study were stratified by  
63 location, gender, age, and Socio-Demographic Index (SDI) status, and we further  
64 analyzed the trends in disease burden over the demographics and time dimensions.  
65 This study represents the first global epidemiological analysis specifically addressing  
66 stroke related to metabolic factors, providing valuable insights for developing  
67 prevention strategies tailored to the metabolic risk profiles of different countries and  
68 regions.

69

## 70 **Methods**

### 71 2.1 Data Sources

72 The GBD 2021 study provided a systematic and comprehensive assessment of  
73 diseases and injuries worldwide from 1990 to 2021.<sup>13</sup> Data sources included field  
74 surveys, censuses, vital registration data, and other health-related data sources.<sup>12</sup> The  
75 GBD study followed the Guidelines for Accurate and Transparent Health Estimates  
76 Reporting (GATHER).<sup>14</sup>

77 The results were available from the GBD online results tool  
78 (<https://vizhub.healthdata.org/gbd-results/>) and could be viewed interactively via the  
79 GBD compare tool (<https://vizhub.healthdata.org/gbd-compare/>). ).

### 80 2.2 Exposure and Outcomes

81 There were three primary risk factors in the GBD study (Supplemental Table 1).  
82 Metabolic risk was a primary risk factor, including high fasting plasma glucose, high  
83 LDL cholesterol, high systolic blood pressure, high body mass index, low bone  
84 mineral density, and impaired kidney function. (Supplemental Table 1) Stroke was a  
85 third-level disease in the GBD study, which included three fourth-level diseases. The  
86 definition of each disease could be found in previous research.<sup>15</sup>

87 SDI, a composite indicator of social and economic factors influencing health  
88 outcomes in each region, was calculated by GBD 2021 for each country.<sup>16</sup> SDI was  
89 categorized into five levels: low, low-middle, middle, high-middle, and high based on  
90 GBD result Website (<https://vizhub.healthdata.org/gbd-results/>). The 204 countries  
91 were classified into different SDI regions based on their SDI scores: low SDI (0–  
92 0.455), low-middle SDI (0.456–0.608), middle SDI (0.609–0.690), high-middle SDI  
93 (0.690–0.805), and high SDI (0.806–1).<sup>17</sup>

### 94 2.3 Data Analysis

95 To avoid the potential impact of the COVID-19 pandemic<sup>18,19</sup> on the results, we  
96 limited our analysis to data from 1990 to 2019. Age-standardized rates (ASR) of  
97 DALYs and deaths were used to compare the effect of metabolic-related stroke in  
98 different years, sexes, regions, and age groups.<sup>20</sup> Unless otherwise specified, DALYs

99 and mortality rates were age-standardized and reported per 100,000 persons.

100 The calculation of time trend was based on the Average Annual Percent Change  
101 (AAPC) indicator,<sup>21</sup> AAPCs were calculated using the Joinpoint software (Version  
102 5.2.0).<sup>22</sup> For calculating the AAPC from 1990 to 2019, we selected 0 joinpoint index.

103 To determine the proportion of strokes attributable to various risk factors, we  
104 utilized the GBD results to obtain DALYs and mortality rates for each risk factor and  
105 calculated the proportion by dividing the value for each specific risk factor by the  
106 total. Statistical analysis and graphical mapping were conducted using Excel 2020,  
107 PowerPoint 2020, and R software (version 4.1.1), with packages ggplot2,<sup>23</sup> dplyr,<sup>24</sup>  
108 countrycode,<sup>25</sup> and scatterpie.<sup>26</sup> Confidence intervals were two-tailed at 95%, and  
109 p-values < 0.05 were considered statistically significant.

## 110 **Results:**

### 111 3.1 Global Burden of Stroke Attributable to Metabolic Risks

112 In 2019, the age-standardized DALYs rate due to metabolic risk-related stroke  
113 globally was 1321.94 (1104.76, 1507.9) and the mortality rate was 62.73 (52.26, 71.7),  
114 both showing significant declines compared to 1990 (Table 1). From 1990 to 2019,  
115 the AAPC for age-standardized DALYs was -1.70% (-1.81%, -1.58%), and for  
116 mortality rate, the AAPC was -1.57% (-1.68%, -1.46%) (Table 1). Geographically, the  
117 world was divided into 33 regions (Table 1). In 2019, Southeast Asia had the highest  
118 age-standardized mortality rate (ASMR) of 116.21 (98.02, 133.41) and the highest  
119 age-standardized DALYs rate of 2500.54 (2104.75, 2894.53) (Table 1). Except for  
120 Southern Africa and Southern Sub-Saharan Africa, the other 31 regions showed  
121 significant declines in both rates from 1990 to 2019, with AAPCs less than 0 (Table  
122 1).

123 At the country level (Supplemental Table 2, Figure 1), the Republic of Nauru had  
124 the highest rates in 1990 with an ASR of DALYs 4759.53 (3678.31, 6011.55) and the  
125 Republic of Serbia had an ASMR of 252.39 (212.12, 290.61). In 2019, the highest  
126 rates were again in the Republic of Nauru with a DALYs rate of 4527.26 (3412.25,  
127 5837.06) and North Macedonia with a mortality rate of 240.36 (199.66, 277.11).  
128 Singapore had the lowest ASMR in 2019 at 9.48 (7.39, 11.45), and the Swiss  
129 Confederation had the lowest DALYs ASR at 234.72 (186.91, 277.78) (Supplemental  
130 Table 2, Figure 2). A total of 170 countries showed significant declines in DALYs  
131 rates, and 165 countries showed significant declines in mortality rates (Supplemental  
132 Table 2, Figure 2). The Republic of Korea had the most pronounced decrease in  
133 DALYs rate with an AAPC of -6.55% (-6.92%, -6.28%), and the Republic of Estonia  
134 had the most pronounced decrease in mortality rate with an AAPC of -6.66% (-7.31%,  
135 -6.01%). Conversely, the Kingdom of Lesotho exhibited the most significant increase  
136 in both DALYs and mortality rates (Supplemental Table 2, Figure 2).

### 137 3.2 Impact of SDI on Stroke Burden Attributable to Metabolic Risks

138 We found that in 2019, regions with high SDI had significantly lower ASMR

139 (23.15 [18.51, 26.85]) and DALYs ASR (504.31 [417.8, 582.61]) compared to other  
140 SDI regions (Table 1, Figure 2a). The AAPC was also the lowest in five SDI level  
141 regions, with AAPC of mortality at -3.47% (-3.61%, -3.32%) and DALYs at -3.03%  
142 (-3.17%, -2.89%) (Table 1). However, regardless of whether it was in 1990 or 2019,  
143 the regions with the highest ASR of DALYs or mortality rates were not the low SDI  
144 regions (Table 1). The regions with high-medium SDI exhibited a significant upward  
145 trend in both DALYs and mortality rates from 1990 to 1994 (Figure 2 a, f).

146 Among 204 countries, we found that as SDI increased, both ASR of DALYs  
147 (Figure 2d) and mortality rates (Figure 2i) in 2019 showed a significant decline. The  
148 AAPC from 1990 to 2019 also displayed a downward trend with the SDI upward  
149 (Figure 2e, j), and this decline was exponential; the higher the SDI, the more  
150 pronounced the decrease (Figure 2d, e, i, j).

### 151 3.3 Gender and Age Heterogeneity in Stroke Burden Due to Metabolic Risks

152 Globally, the impact of metabolic risks on males was greater than on females  
153 both on DALYs ASR and ASMR, and the trend of change was consistent for both  
154 genders, with AAPCs being less than 0 (Table 1). Except for the low-middle SDI  
155 region, where the ASMR of male was lower than that of female during 1990-1999,  
156 male consistently had higher age-standardized mortality rates and DALYs rates in all  
157 other SDI level regions and time periods during 1990-2019. (Figure 2b, c, g, h).

158 In different age groups, the stroke-related DALYs and deaths rates  
159 predominantly affected individuals aged 75 and above, with a lesser impact on those  
160 under 55. (Figure 3a). For the 20-24 age group, the AAPC from 1990 to 2019 was  
161 greater than 0 for both DALYs 5.18 (4.59, 5.78) and mortality rates 5.84 (5.07, 6.61)  
162 (Figure 3b), but the 2019 rates of DALYs 7.40 (0.52, 16.74) and deaths 0.08 (0.003,  
163 0.18) was visible lower than other age groups (Figure 2a). All other age groups  
164 showed significant declines (Figure 3b). Additionally, as the SDI level increased, the  
165 percentage of DALYs or mortality rates among the population over 85 years old rose  
166 compared to other age groups. In North America, high-income Asia Pacific, Western  
167 Europe, and Australasia, individuals over 85 accounted for more than 70% of the

168 2019 mortality rate from metabolic-related strokes (Figure 3c).

### 169 3.4 Proportional Contribution of Risk Factors to Stroke

170 Comparing age-standardized mortality and DALYs due to the three primary risk  
171 factors identified in the GBD study (Environmental/Occupational risks, Behavioral  
172 risks, and Metabolic risks), we found that metabolic risks contributed the highest  
173 percentage to stroke-related ASMR (50.82%) and DALYs (48.80%) globally in 2019  
174 (Figure 4a), followed by Environmental/Occupational risks. The 1990 composition  
175 ratio ranking was also similar to 2019 (Figure 4a). As SDI increased, the composition  
176 ratio of DALYs ASR and ASMR due to Environmental/Occupational risks decreased,  
177 while Behavioral and Metabolic risks increased (Figure 4a). In high SDI regions,  
178 metabolic risks accounted for 58.59% of stroke-related deaths in 2019 (Figure 4a).  
179 This trend was also observed across different genders (Figure 4b, c). For males, the  
180 proportion of behavioral risks was higher than for females regardless of the data  
181 collection year or outcome measure, while the proportion of metabolic and  
182 environmental risks was lower for females (Figure 4d).

### 183 3.5 Burden Proportions of Stroke Types Attributable to Metabolic Risks

184 Based on the GBD study's four-level causes, stroke was categorized into  
185 intracerebral hemorrhage, ischemic stroke, and subarachnoid hemorrhage.<sup>15</sup> From  
186 1990 to 2019, age-standardized mortality and DALYs rates for these stroke subtypes  
187 attributable to metabolic factors showed a declining trend globally and across all SDI  
188 regions (Figure 5a, b). The most significant decline in DALYs for ischemic stroke was  
189 observed in high-middle SDI regions, dropping from 1478.48 (1276.71, 1648.34) in  
190 1990 to 869.25 (727.48, 981.48) in 2019 (Figure 5a, b).

191 Globally in 2019, ischemic stroke due to metabolic risks had the highest ASMR  
192 (34.67 [28.44, 39.67]) and DALYs rate (661.26 [554.38, 749.68]) among the three  
193 subtypes, while subarachnoid hemorrhage had the lowest ASMR (2.41 [1.79, 3.03])  
194 and DALYs rate (67.61 [49.87, 85.50]) (Figure 5a, b). With decreasing SDI levels  
195 (from High to Low), the ASMR for intracerebral hemorrhage increased (Figure 5b). In  
196 high SDI regions, the ASMR for ischemic stroke was 15.11 (12.20, 17.67) compared



197 to 6.44 (5.20, 7.66) for intracerebral hemorrhage, and the rates were 37.20 (29.70,  
198 45.89) for ischemic stroke and 38.02 (29.19, 46.39) for intracerebral hemorrhage in  
199 the low SDI regions (Figure 5b). Except for the slightly lower age-standardized  
200 mortality rate for subarachnoid hemorrhage in high SDI regions for males (1.55 [1.13,  
201 1.89]) compared to females (1.61 [1.16, 2.00]), age-standardized DALYs and  
202 mortality rates were higher in males for all subtypes globally and across SDI regions  
203 (Figure 5c, d). For both genders, the 10-55 and 50-74 age groups had the highest  
204 DALYs and mortality rates due to intracerebral hemorrhage among the three subtypes  
205 (Figure 5e, f). For those aged 75-84 and over 85, ischemic stroke was the leading  
206 subtype contributing to DALYs and mortality rates (Figure 5c, d). Across all age  
207 groups, subarachnoid hemorrhage had the lowest DALYs and mortality rates among  
208 the three subtypes (Figure 5c, d).

209

210 **Discussion:**

211 Despite the similarities in global distribution patterns between metabolic risk  
212 related stroke and stroke caused by all factors<sup>15</sup>—such as overall global levels and the  
213 decreasing ASMR and DALY rates across the five SDI levels—there are notable  
214 differences in how metabolic risk-related stroke is distributed by region and SDI  
215 compared to stroke from all causes.<sup>15</sup> For example, in 2019, the highest stroke  
216 mortality rate from all causes was observed in the low SDI category, while the lowest  
217 incidence of metabolic stroke occurred in the low-middle SDI category. Oceania had  
218 the highest all-cause stroke-related DALYs in 2019, with a rate of 2,998.97 (2,432.79,  
219 3,617.12). In contrast, Southeast Asia had the highest metabolic stroke-related DALYs,  
220 with a rate of 2,500.54 (2,104.75, 2,894.53).

221 Southeast Asia had the highest ASMR for metabolic stroke among the 33 regions,  
222 while Singapore, also located in Southeast Asia, had the lowest ASMR for metabolic  
223 stroke in 2019. (Supplemental Table 2) This suggests that ethnicity and geographic  
224 location may not be the primary factors influencing metabolic stroke mortality or  
225 DALY rates.<sup>2 27</sup> Instead, public health and healthcare systems, socioeconomic factors,  
226 and lifestyle choices likely play a more significant role.<sup>28 29</sup> From 1990 to 2019,  
227 South Korea saw the most significant decline in the ASR of metabolic stroke DALYs,  
228 while Estonia experienced the most notable decrease in mortality rates.<sup>30</sup> During this  
229 period, South Korea's Gross Domestic Product (GDP) per capita rose from \$6,000 in  
230 1990 to \$31,500 in 2019 from World Bank website. Similarly, Estonia underwent  
231 significant socioeconomic improvements after gaining independence from the Soviet  
232 Union in 1991, transforming into a high-income country with an efficient economic  
233 and social system.<sup>30</sup>

234 In contrast, sub-Saharan Africa and Southern Africa did not see significant  
235 declines in metabolic stroke rates (Table 1). This could be due to metabolic risk  
236 factors often being overlooked in African stroke patients, with the overall stroke  
237 proportion not decreasing.<sup>31 32 33</sup> Furthermore, Southern Africa has the highest  
238 prevalence of metabolic syndrome in Africa.<sup>34</sup> Addressing metabolic risk factors is

239 likely the most effective way to mitigate the impact of strokes in Africa.<sup>29,35</sup>  
240 Lesotho, another Southern African country, saw the most significant increase in both  
241 ASR of DALYs and deaths from 1990 to 2019 (Supplemental Table 2). Clinical  
242 studies indicate that CVDRF is highly prevalent across all age and gender groups in  
243 Lesotho,<sup>36</sup> highlighting the importance of strengthening preventive measures in  
244 Lesotho and similar regions in Southern Africa. Overall, enhancing national economic  
245 levels,<sup>37</sup> developing plans to protect against and manage metabolic risk factors,<sup>38</sup> and  
246 individuals paying more attention to metabolic factors related to stroke<sup>38</sup> were crucial  
247 for reducing DALYs and mortality rates caused by metabolic stroke.

248 As SDI increases, ASR of DALYs and mortality rates shown a similar  
249 exponential decline, and the AAPC trend is consistent. This indicates that developing  
250 countries with weak socioeconomic foundations face a greater challenge of a  
251 sustained burden of metabolic stroke compared to developed nations.<sup>39</sup> In  
252 high-income regions such as North America, high-income Asia Pacific, Western  
253 Europe, and Australia, individuals aged 85 and above accounted for over 70% of  
254 metabolic stroke mortality in 2019. These high-income countries face more severe  
255 aging problems,<sup>40</sup> with the proportion of elderly people increasing annually.<sup>40</sup> As  
256 people age, they accumulate metabolic-related diseases (such as diabetes,  
257 hypertension, and high cholesterol)<sup>41</sup>, increasing their risk of stroke. Additionally, the  
258 physiological frailty of individuals aged 85 and above results in poorer stroke  
259 outcomes.<sup>42</sup> These findings suggest the need to strengthen the prevention and  
260 management of metabolic-related diseases in developing countries. In high-income  
261 countries, should pay more attention to the issue of population aging.

262 Our study also found that, regardless of data collection year and outcome  
263 measures, the proportion of behavior risk-related stroke is consistently higher in men  
264 than in women, while the proportion of metabolic and environmental risk-related  
265 stroke is lower in men. However, strokes related to these three risk factors result in  
266 more severe DALYs and mortality rates in men. This may be due to men's insufficient  
267 management of metabolic-related diseases (such as hypertension and diabetes),

268 combined with the additive effect of high behavioral risks,<sup>43</sup> leading to a higher risk  
269 of stroke and more severe outcomes. Increasing men's awareness and management of  
270 metabolic diseases, along with regular health screenings and early intervention, can  
271 lower stroke incidence and severity.<sup>44</sup>

272

### 273 **Limitations**

274 Despite the comprehensive nature of our analysis, several limitations should be  
275 acknowledged. The reliance on secondary data sources may introduce reporting biases.  
276 The variability in healthcare infrastructure and diagnostic capabilities across regions  
277 could affect the accuracy of our findings.

278

### 279 **Conclusion**

280 Our study highlights significant global progress in reducing the stroke burden  
281 attributable to metabolic risks, particularly in high SDI regions. However, persistent  
282 disparities across different SDI levels, genders, and age groups necessitate continued  
283 efforts to address these gaps. Comprehensive public health strategies targeting  
284 metabolic risks, with a focus on high-risk populations, are essential to further mitigate  
285 the global stroke burden.

286

287 **Funding:** National Natural Science Foundation of China Regional Science  
288 Foundation Project (82060857); The Science and Technology Program of Jiangxi  
289 Provincial Health and Health Commission (SKJP220219475).

290

291 **Disclosure:** The authors declare no conflict of interest.

292 Reference:

- 293 1. Katan M, Luft A. Global burden of stroke. Paper/Poster presented at: Seminars in  
294 neurology; 2018;
- 295 2. Lackland DT, Roccella EJ, Deutsch AF, Fornage M, George MG, Howard G, Kissela  
296 BM, Kittner SJ, Lichtman JH, Lisabeth LD. Factors influencing the decline in stroke  
297 mortality: a statement from the American Heart Association/American Stroke  
298 Association. *Stroke*. 2014;45:315-353.
- 299 3. Mukherjee D, Patil CG. Epidemiology and the global burden of stroke. *World*  
300 *neurosurgery*. 2011;76:S85-S90.
- 301 4. Collaborators GS. Global, regional, and national burden of stroke and its risk factors,  
302 1990–2019: a systematic analysis for the Global Burden of Disease Study 2019. *The*  
303 *Lancet Neurology*. 2021;20:795.
- 304 5. Guzik A, Bushnell C. Stroke epidemiology and risk factor management. *CONTINUUM:*  
305 *Lifelong Learning in Neurology*. 2017;23:15-39.
- 306 6. Mosenzon O, Cheng AY, Rabinstein AA, Sacco S. Diabetes and stroke: what are the  
307 connections? *Journal of Stroke*. 2023;25:26-38.
- 308 7. Yuan S, Huang X, Ma W, Yang R, Xu F, Han D, Huang T, Peng M, Xu A, Lyu J.  
309 Associations of HDL-C/LDL-C with myocardial infarction, all-cause mortality,  
310 haemorrhagic stroke and ischaemic stroke: a longitudinal study based on 384 093  
311 participants from the UK Biobank. *Stroke and Vascular Neurology*. 2023;8.
- 312 8. Lawes CM, Bennett DA, Feigin VL, Rodgers A. Blood pressure and stroke: an  
313 overview of published reviews. *Stroke*. 2004;35:776-785.

- 314 9. Ye J, Hu Y, Chen X, Yin Z, Yuan X, Huang L, Li K. Association between the  
315 weight-adjusted waist index and stroke: a cross-sectional study. *BMC Public Health*.  
316 2023;23:1689.
- 317 10. Jørgensen L, Engstad T, Jacobsen BK. Bone mineral density in acute stroke patients:  
318 low bone mineral density may predict first stroke in women. *Stroke*. 2001;32:47-51.
- 319 11. Fabjan TH, Hojs R. Stroke and renal dysfunction. *European journal of internal*  
320 *medicine*. 2014;25:18-24.
- 321 12. Murray CJ. The global burden of disease study at 30 years. *Nature medicine*.  
322 2022;28:2019-2026.
- 323 13. Mensah GA, Fuster V, Murray CJ, Roth GA, Diseases GBoC, Collaborators R. Global  
324 burden of cardiovascular diseases and risks, 1990-2022. *Journal of the American*  
325 *College of Cardiology*. 2023;82:2350-2473.
- 326 14. Stevens GA, Alkema L, Black RE, Boerma JT, Collins GS, Ezzati M, Grove JT, Hogan  
327 DR, Hogan MC, Horton R. Guidelines for accurate and transparent health estimates  
328 reporting: the GATHER statement. *The Lancet*. 2016;388:e19-e23.
- 329 15. Feigin VL, Stark BA, Johnson CO, Roth GA, Bisignano C, Abady GG, Abbasifard M,  
330 Abbasi-Kangevari M, Abd-Allah F, Abedi V. Global, regional, and national burden of  
331 stroke and its risk factors, 1990–2019: a systematic analysis for the Global Burden of  
332 Disease Study 2019. *The Lancet Neurology*. 2021;20:795-820.
- 333 16. IfH M. Evaluation. Global Burden of Disease Collaborative Network. Global Burden of  
334 Disease Study 2016 (GBD 2016) Results. *Institute for Health Metrics and Evaluation*  
335 *Seattle*. 2017.

- 336 17. Jiang X, Ling J, Xiong Q, Chen W, Zou L, Ling Z. Global, regional, and national burden  
337 of atrial fibrillation/flutter related to metabolic risks over three decades: estimates from  
338 the global burden of disease study 2019. *Eur Heart J Qual Care Clin Outcomes*. 2024.  
339 doi: 10.1093/ehjqcco/qcae033
- 340 18. Bersano A, Kraemer M, Touzé E, Weber R, Alamowitch S, Sibon I, Pantoni L. Stroke  
341 care during the COVID-19 pandemic: experience from three large European countries.  
342 *European journal of neurology*. 2020;27:1794-1800.
- 343 19. Hoyer C, Ebert A, Huttner HB, Puetz V, Kallmünzer B, Barlinn K, Haverkamp C,  
344 Harloff A, Brich J, Platten M. Acute stroke in times of the COVID-19 pandemic: a  
345 multicenter study. *Stroke*. 2020;51:2224-2227.
- 346 20. Chen S, Liu M, Xie F. Global and national burden and trends of mortality and  
347 disability-adjusted life years for silicosis, from 1990 to 2019: results from the Global  
348 Burden of Disease study 2019. *BMC pulmonary medicine*. 2022;22:240.
- 349 21. Clegg LX, Hankey BF, Tiwari R, Feuer EJ, Edwards BK. Estimating average annual  
350 per cent change in trend analysis. *Statistics in medicine*. 2009;28:3670-3682.
- 351 22. Kim HJ, Fay MP, Feuer EJ, Midthune DN. Permutation tests for joinpoint regression  
352 with applications to cancer rates. *Statistics in medicine*. 2000;19:335-351.
- 353 23. Wickham H. ggplot2. *Wiley interdisciplinary reviews: computational statistics*.  
354 2011;3:180-185.
- 355 24. Yarberry W, Yarberry W. Dplyr. *CRAN recipes: DPLYR, stringr, lubridate, and regex in*  
356 *R*. 2021:1-58.
- 357 25. Arel-Bundock V, Enevoldsen N, Yetman C. countrycode: An R package to convert



- 358 country names and country codes. *Journal of Open Source Software*. 2018;3:848.
- 359 26. Yu G, Yu MG. Package'scatterpie'. *R Package Version*. 2018;1.
- 360 27. Kim AS, Cahill E, Cheng NT. Global stroke belt: geographic variation in stroke burden  
361 worldwide. *Stroke*. 2015;46:3564-3570.
- 362 28. Lindmark A, Eriksson M, Darehed D. Socioeconomic status and stroke severity:  
363 Understanding indirect effects via risk factors and stroke prevention using innovative  
364 statistical methods for mediation analysis. *PLoS One*. 2022;17:e0270533.
- 365 29. Hankey GJ. Population impact of potentially modifiable risk factors for stroke. *Stroke*.  
366 2020;51:719-728.
- 367 30. Kõrv L, Vibo R, Kõrv J. Declining first-ever stroke incidence rates in 15-to 54-year-old  
368 residents of Tartu, Estonia, from 1991 to 2017. *International Journal of Stroke*.  
369 2023;18:462-468.
- 370 31. Kengne AP, Anderson CS. The neglected burden of stroke in Sub-Saharan Africa.  
371 *International Journal of Stroke*. 2006;1:180-190.
- 372 32. BeLue R, Okoror TA, Iwelunmor J, Taylor KD, Degboe AN, Agyemang C, Ogedegbe  
373 G. An overview of cardiovascular risk factor burden in sub-Saharan African countries:  
374 a socio-cultural perspective. *Globalization and health*. 2009;5:1-12.
- 375 33. Peer N, Baatiema L, Kengne A-P. Ischaemic heart disease, stroke, and their  
376 cardiometabolic risk factors in Africa: current challenges and outlook for the future.  
377 *Expert review of cardiovascular therapy*. 2021;19:129-140.
- 378 34. Faijer-Westerink HJ, Kengne AP, Meeks KA, Agyemang C. Prevalence of metabolic  
379 syndrome in sub-Saharan Africa: A systematic review and meta-analysis. *Nutrition*,

- 380            *Metabolism and Cardiovascular Diseases*. 2020;30:547-565.
- 381    35.    Akinyemi RO, Ovbiagele B, Adeniji OA, Sarfo FS, Abd-Allah F, Adoukonou T, Ogah  
382            OS, Naidoo P, Damasceno A, Walker RW. Stroke in Africa: profile, progress,  
383            prospects and priorities. *Nature Reviews Neurology*. 2021;17:634-656.
- 384    36.    González Fernández L, Firima E, Gupta R, Sematle MaP, Khomolishoele M, Molulela  
385            M, Bane M, Meli R, Tlahali M, Lee T. Prevalence and determinants of cardiovascular  
386            risk factors in Lesotho: a population-based survey. *International Health*.  
387            2024;16:313-324.
- 388    37.    Owolabi MO, Thrift AG, Martins S, Johnson W, Pandian J, Abd-Allah F, Varghese C,  
389            Mahal A, Yaria J, Phan HT. The state of stroke services across the globe: Report of  
390            World Stroke Organization–World Health Organization surveys. *International Journal*  
391            *of Stroke*. 2021;16:889-901.
- 392    38.    Zhang F, Liu L, Zhang C, Ji S, Mei Z, Li T. Association of metabolic syndrome and its  
393            components with risk of stroke recurrence and mortality: a meta-analysis. *Neurology*.  
394            2021;97:e695-e705.
- 395    39.    Inam M, Samad Z, Vaughan EM, Almas A, Hanif B, Minhas AM, Jarrar Z, Habib FZ,  
396            Sheikh S, Zhu D. Global cardiovascular research: Gaps and opportunities. *Current*  
397            *Cardiology Reports*. 2023;25:1831-1838.
- 398    40.    Mitchell E, Walker R. Global ageing: successes, challenges and opportunities. *British*  
399            *journal of hospital medicine*. 2020;81:1-9.
- 400    41.    Mengozzi A, Pugliese NR, Chiriaco M, Masi S, Virdis A, Taddei S. Microvascular  
401            ageing links metabolic disease to age-related disorders: the role of oxidative stress

- 402 and inflammation in promoting microvascular dysfunction. *Journal of Cardiovascular*  
403 *Pharmacology*. 2021;78:S78-S87.
- 404 42. Kanai M, Noguchi M, Kubo H, Nozoe M, Kitano T, Izawa KP, Mase K, Shimada S.  
405 Pre-stroke frailty and stroke severity in elderly patients with acute stroke. *Journal of*  
406 *Stroke and Cerebrovascular Diseases*. 2020;29:105346.
- 407 43. Oh JE. Association between smoking status and metabolic syndrome in men. *The*  
408 *Korean journal of obesity*. 2014;23:99-105.
- 409 44. Goldstein LB, Bushnell CD, Adams RJ, Appel LJ, Braun LT, Chaturvedi S, Creager  
410 MA, Culebras A, Eckel RH, Hart RG. Guidelines for the primary prevention of stroke: a  
411 guideline for healthcare professionals from the American Heart Association/American  
412 Stroke Association. *Stroke*. 2011;42:517-584.
- 413  
414

415 Table 1: The Global Distribution of Metabolic-related Stroke from 1990 to 2019.

| Region                      | ASR of Deaths (per 100,000 persons) |                        |                      | ASR of DALYs (per 100,000 persons) |                            |                      |
|-----------------------------|-------------------------------------|------------------------|----------------------|------------------------------------|----------------------------|----------------------|
|                             | 1990                                | 2019                   | AAPC (%)             | 1990                               | 2019                       | AAPC (%)             |
| Global                      | 98.05 (81.38, 111.82)               | 62.73 (52.26, 71.7)    | -1.57 (-1.68, -1.46) | 1984.33 (1641.39, 2284.5)          | 1321.94 (1104.76, 1507.9)  | -1.70 (-1.81, -1.58) |
| Gender                      |                                     |                        |                      |                                    |                            |                      |
| Female                      | 92.41 (76.01, 105.37)               | 54.52 (45.02, 63.04)   | -2.02 (-2.15, -1.89) | 1816.30 (1495.85, 2091.62)         | 1115.70 (934.35, 1280.44)  | -1.88 (-2.01, -1.77) |
| Male                        | 103.85 (85.09, 121.23)              | 72.36 (58.32, 84.31)   | -1.36 (-1.47, -1.25) | 2164.03 (1760.47, 2525.56)         | 1550.15 (1276.80, 1795.45) | -1.27 (-1.39, -1.17) |
| SDI Level                   |                                     |                        |                      |                                    |                            |                      |
| High SDI                    | 59.92 (49.74, 67.59)                | 23.15 (18.51, 26.85)   | -3.47 (-3.61, -3.32) | 1151.72 (970.98, 1305.46)          | 504.31 (417.8, 582.61)     | -3.03 (-3.17, -2.89) |
| High-middle SDI             | 132.95 (110.1, 151.1)               | 74.27 (60.54, 85.6)    | -2.32 (-2.58, -2.06) | 2508.28 (2089.24, 2859.93)         | 1455.28 (1190.78, 1664.52) | -2.21 (-2.48, -1.94) |
| Middle SDI                  | 112.49 (90.39, 132.19)              | 79.62 (64.58, 92.54)   | -1.25 (-1.38, -1.12) | 2311.85 (1863.53, 2737.07)         | 1616.17 (1323.16, 1867.44) | -1.29 (-1.4, -1.19)  |
| Low-middle SDI              | 91.42 (73.5, 106.87)                | 77.38 (65.18, 88.39)   | -0.65 (-0.7, -0.61)  | 1991.79 (1600.25, 2324.2)          | 1661.69 (1396.19, 1905.33) | -0.71 (-0.76, -0.66) |
| Low SDI                     | 94.03 (74.58, 111.7)                | 77.32 (63.24, 90.72)   | -0.77 (-0.82, -0.71) | 2073.62 (1628.83, 2476.56)         | 1660.92 (1356.02, 1953.27) | -0.88 (-0.94, -0.82) |
| Location                    |                                     |                        |                      |                                    |                            |                      |
| Africa                      | 108.88 (88.12, 127.26)              | 92.06 (76.27, 105.76)  | -0.58 (-0.68, -0.48) | 2292.61 (1849.11, 2673.82)         | 1886.79 (1567.5, 2178.47)  | -0.69 (-0.79, -0.6)  |
| Central Africa              | 114.35 (86.55, 141.93)              | 102.13 (79.21, 126.64) | -0.49 (-0.63, -0.35) | 2479.81 (1869.75, 3099.59)         | 2146.35 (1676.75, 2665.89) | -0.6 (-0.75, -0.46)  |
| Central Sub-Saharan Africa  | 118.85 (89.74, 149.94)              | 97.4 (74.22, 127.62)   | -0.78 (-0.86, -0.7)  | 2570.82 (1913.87, 3276.18)         | 2031.16 (1536.57, 2635.3)  | -0.91 (-0.99, -0.83) |
| Eastern Africa              | 98.5 (77.03, 118.57)                | 72.25 (56.51, 86.68)   | -1.22 (-1.28, -1.16) | 2165.11 (1677.52, 2624.4)          | 1551.89 (1242.26, 1855.31) | -1.32 (-1.38, -1.25) |
| Eastern Sub-Saharan Africa  | 97.06 (74.78, 118.74)               | 79.27 (62.51, 95.19)   | -0.81 (-0.86, -0.76) | 2168 (1672.15, 2682.88)            | 1737.23 (1376.82, 2077.23) | -0.89 (-0.94, -0.84) |
| Northern Africa             | 130.06 (101.48, 157.76)             | 101.16 (82.95, 119.17) | -0.68 (-0.75, -0.61) | 2489.67 (1950.94, 3014.86)         | 1909.34 (1579.42, 2235.51) | -0.78 (-0.85, -0.71) |
| Southern Africa             | 88.72 (71.02, 104.85)               | 100.48 (82.97, 115.45) | 0.36 (0.01, 0.7)     | 2005.63 (1631.81, 2354.15)         | 2129.77 (1774.3, 2468.35)  | 0.21 (-0.1, 0.53)    |
| Southern Sub-Saharan Africa | 71.16 (55.49, 84.77)                | 87.07 (72.94, 98.07)   | 0.42 (-0.1, 0.93)    | 1604.53 (1290, 1891.92)            | 1781.8 (1496.86, 2009.13)  | 0.23 (-0.25, 0.73)   |
| Western Africa              | 110.16 (86.96, 130.51)              | 93.49 (78.52, 109.33)  | -0.58 (-0.66, -0.5)  | 2334.51 (1846.25, 2749.69)         | 1941.65 (1631.68, 2277.26) | -0.66 (-0.74, -0.58) |
| Western Sub-Saharan Africa  | 109.32 (86.48, 129.64)              | 95.42 (79.56, 111.35)  | -0.49 (-0.59, -0.39) | 2320.66 (1829.62, 2736.63)         | 1988.59 (1649.66, 2323.94) | -0.56 (-0.67, -0.45) |
| America                     | 47.55 (38.94, 57.16)                | 27.2 (22.29, 32.21)    | -2.1 (-2.21, -2.0)   | 1012.22 (842.44, 1190.0)           | 585.66 (491.24, 680.08)    | -2.05 (-2.16, -1.94) |

|                              |                            |                           |                         |                               |                               |                         |
|------------------------------|----------------------------|---------------------------|-------------------------|-------------------------------|-------------------------------|-------------------------|
|                              | 54.25)                     | 31.2)                     | -1.98)                  | 1154.55)                      | 672.33)                       | -1.93)                  |
| North America                | 32.79 (26.87,<br>37.36)    | 20.16 (16.08,<br>23.56)   | -2.08 (-2.36,<br>-1.8)  | 670.46 (562.55,<br>762.88)    | 442.62 (363.78,<br>514.99)    | -1.76 (-1.99,<br>-1.54) |
| High-income North<br>America | 32.79 (26.87,<br>37.36)    | 20.17 (16.09,<br>23.56)   | -2.08 (-2.36,<br>-1.8)  | 670.56 (562.63,<br>763)       | 442.68 (363.82,<br>515.05)    | -1.76 (-1.99,<br>-1.54) |
| Caribbean                    | 69.62 (57.18,<br>80.82)    | 50.39 (41.1,<br>59.57)    | -1.07 (-1.14,<br>-1)    | 1468.02 (1191.26,<br>1721.56) | 1119.98 (895.05,<br>1348.33)  | -0.9 (-0.99,<br>-0.81)  |
| Central Latin<br>America     | 46.59 (38.89,<br>53.09)    | 26.42 (22.12,<br>30.1)    | -2.09 (-2.22,<br>-1.96) | 939.46 (787.02,<br>1072.63)   | 554.05 (469.58,<br>635.03)    | -1.98 (-2.13,<br>-1.84) |
| Southern Latin<br>America    | 70.09 (56.92,<br>81.57)    | 32.08 (26.01,<br>36.89)   | -2.56 (-2.66,<br>-2.45) | 1425.89 (1134.55,<br>1664.44) | 672.28 (555.71,<br>776.58)    | -2.52 (-2.59,<br>-2.45) |
| Tropical Latin<br>America    | 95.79 (80.28,<br>108.95)   | 39.25 (31.97,<br>44.92)   | -2.97 (-3.03,<br>-2.9)  | 2015.14 (1681.99,<br>2287.76) | 818.1 (679.74,<br>928.97)     | -3.05 (-3.11,<br>-2.99) |
| Andean Latin<br>America      | 36.82 (28.53,<br>45.4)     | 26.12 (20.76,<br>32.09)   | -1.45 (-1.67,<br>-1.23) | 797.63 (608.93,<br>982.96)    | 547.58 (435.34,<br>672.39)    | -1.49 (-1.73,<br>-1.25) |
| Asia                         | 109.73 (88.35,<br>129)     | 76.5 (62.47,<br>88.43)    | -1.34 (-1.47,<br>-1.2)  | 2253.17 (1816.98,<br>2665.1)  | 1589.65 (1311.49,<br>1830.92) | -1.3 (-1.41,<br>-1.18)  |
| East Asia                    | 141.48 (110.69,<br>172.74) | 94.7 (73.8,<br>113.49)    | -1.44 (-1.73,<br>-1.16) | 2748.98 (2135.5,<br>3387.8)   | 1821.95 (1418.66,<br>2190.71) | -1.48 (-1.72,<br>-1.24) |
| Central Asia                 | 114.4 (95.48,<br>129.75)   | 97.45 (82.98,<br>109.79)  | -1.04 (-1.35,<br>-0.74) | 2498.46 (2093.95,<br>2834.32) | 2004.81 (1713.88,<br>2251.1)  | -1.29 (-1.61,<br>-0.96) |
| South Asia                   | 69.16 (54.64,<br>81.69)    | 58.14 (48.03,<br>66.95)   | -0.74 (-0.83,<br>-0.65) | 1533.1 (1213.94,<br>1815.64)  | 1255.96 (1036.97,<br>1453.99) | -0.84 (-0.91,<br>-0.76) |
| Southeast Asia               | 134.35 (107.96,<br>157.97) | 116.21 (98.02,<br>133.41) | -0.5 (-0.66,<br>-0.33)  | 2933.01 (2358.39,<br>3425.11) | 2500.54 (2104.75,<br>2894.53) | -0.54 (-0.67,<br>-0.41) |
| High-income Asia<br>Pacific  | 76.49 (63.54,<br>86.97)    | 20.37 (15.91,<br>24.35)   | -4.72 (-4.9,<br>-4.54)  | 1495.48 (1244.17,<br>1699.49) | 479.44 (392.86,<br>559.45)    | -4.12 (-4.3,<br>-3.93)  |
| Western Pacific<br>Region    | 124.25 (98.32,<br>148.17)  | 78.71 (62.23,<br>93.67)   | -1.6 (-1.79,<br>-1.42)  | 2456.18 (1948.33,<br>2964.63) | 1599.54 (1261.08,<br>1900.22) | -1.5 (-1.66,<br>-1.35)  |
| Europe                       | 103.08 (86.83,<br>115.32)  | 44.98 (37.38,<br>50.9)    | -3.26 (-3.5,<br>-3.02)  | 1923 (1646.08,<br>2136.3)     | 900.19 (768.77,<br>1005.92)   | -3.08 (-3.34,<br>-2.81) |
| Central Europe               | 157.31 (135.5,<br>175.52)  | 71.3 (60.64,<br>79.45)    | -3.03 (-3.22,<br>-2.85) | 2890.46 (2506.8,<br>3205)     | 1315.56 (1132.13,<br>1462.32) | -3.06 (-3.25,<br>-2.87) |
| Eastern Europe               | 162.13 (137.67,<br>181.88) | 95.11 (80.44,<br>107.11)  | -2.63 (-3.12,<br>-2.13) | 3021.29 (2609.33,<br>3341.03) | 1873.22 (1603.11,<br>2084.29) | -2.4 (-2.9,<br>-1.89)   |
| Western Europe               | 65.76 (54.93,<br>73.9)     | 19.9 (15.97,<br>23.25)    | -4.22 (-4.35,<br>-4.09) | 1135.49 (961.15,<br>1267.8)   | 382.11 (316.22,<br>443.03)    | -3.87 (-4.01,<br>-3.73) |
| Europe                       | 103.08 (86.83,<br>115.32)  | 44.98 (37.38,<br>50.9)    | -3.26 (-3.5,<br>-3.02)  | 1923 (1646.08,<br>2136.3)     | 900.19 (768.77,<br>1005.92)   | -3.08 (-3.34,<br>-2.81) |
| European Region              | 103.22 (86.9,<br>115.51)   | 46.37 (38.57,<br>52.39)   | -3.16 (-3.4,<br>-2.92)  | 1938.93 (1659.85,<br>2155.18) | 939.12 (802.32,<br>1049.54)   | -2.96 (-3.22,<br>-2.7)  |
| Australasia                  | 48.18 (39.93,<br>54.72)    | 16.56 (13.05,<br>19.8)    | -3.84 (-3.96,<br>-3.72) | 842.69 (711,<br>949.56)       | 316.14 (256.74,<br>371.75)    | -3.54 (-3.69,<br>-3.39) |

|         |                           |                          |                         |                               |                               |                         |
|---------|---------------------------|--------------------------|-------------------------|-------------------------------|-------------------------------|-------------------------|
| Oceania | 106.91 (80.23,<br>134.98) | 93.01 (69.28,<br>119.19) | -0.57 (-0.62,<br>-0.51) | 2370.38 (1771.18,<br>3007.55) | 2107.87 (1590.05,<br>2703.96) | -0.47 (-0.53,<br>-0.41) |
|---------|---------------------------|--------------------------|-------------------------|-------------------------------|-------------------------------|-------------------------|

416 SDI: Socio-demographic Index; ASR: Age-Standardized Rate; AAPC: Average  
417 Annual Percent Change. ASR of Deaths (per 100,000 persons) refers to the  
418 Age-Standardized Rate of deaths per 100,000 persons; ASR of DALYs (per 100,000  
419 persons) refers to the Age-Standardized Rate of DALYs per 100,000 persons; AAPC:  
420 The Average Annual Percent Change between 1990 to 2019.  
421

422 Figure 1: The Global Distribution of Metabolic-related Stroke from 1990 to 2019 in  
423 Country Level.

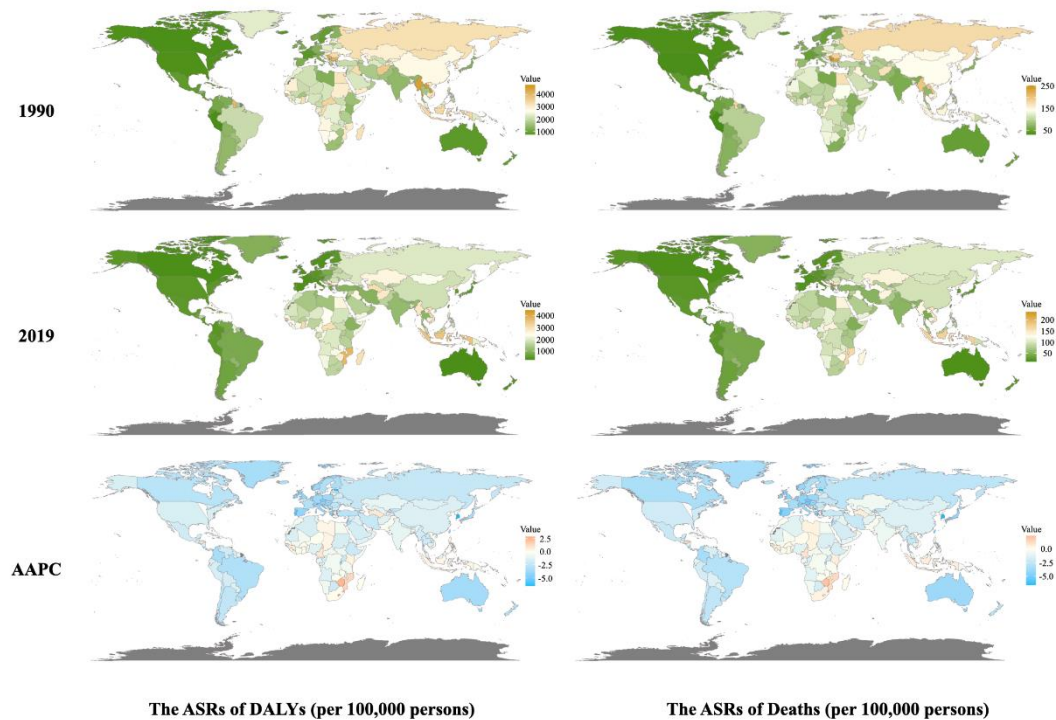

424

425 ASR: Age-Standardized Rate; AAPC: Average Annual Percent Change. ASR of  
426 Deaths (per 100,000 persons) refers to the Age-Standardized Rate of deaths per  
427 100,000 persons; ASR of DALYs (per 100,000 persons) refers to the  
428 Age-Standardized Rate of DALYs per 100,000 persons; AAPC: The Average Annual  
429 Percent Change between 1990 to 2019 in 204 countries around the world.1990:  
430 Age-standardized mortality and DALYs rates for metabolic-related stroke in 204  
431 countries around the world in 1990; 2019: Age-standardized mortality and DALYs  
432 rates for metabolic-related stroke in 204 countries around the world in 2019.

433

434 Figure 2:  
 435 Age-Standardized Mortality Rates and DALYs for Metabolic-Related Stroke by SDI,  
 436 1990-2019.

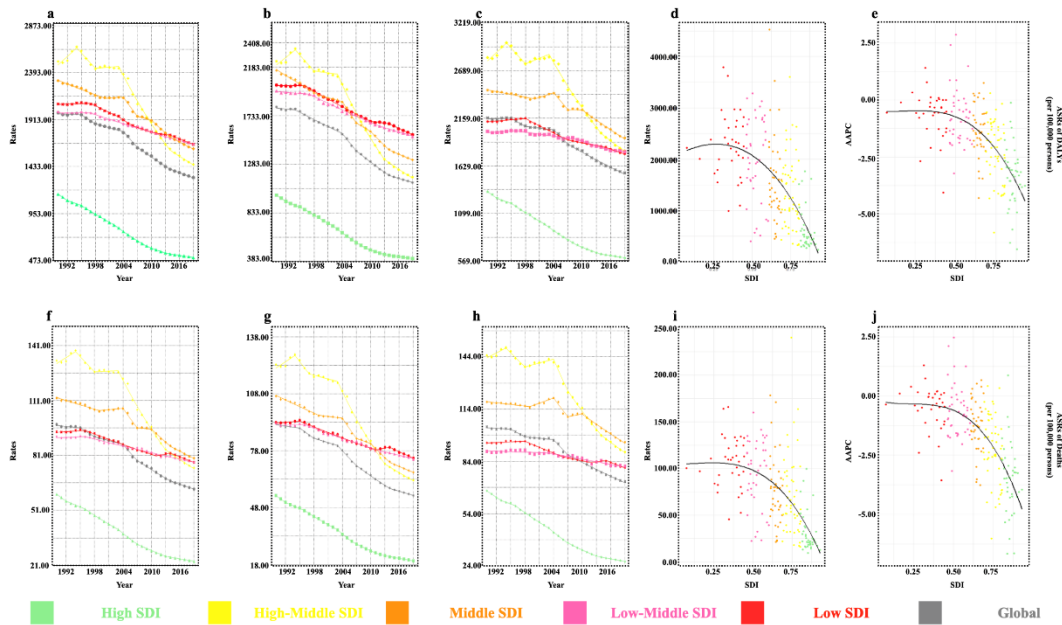

437  
 438 ASR: Age-Standardized Rate; AAPC: Average Annual Percent Change. ASR of  
 439 Deaths (per 100,000 persons) refers to the Age-Standardized Rate of deaths per  
 440 100,000 persons; ASR of DALYs (per 100,000 persons) refers to the  
 441 Age-Standardized Rate of DALYs per 100,000 persons; AAPC: The Average Annual  
 442 Percent Change between 1990 to 2019.  
 443 a, f: Age-standardized DALYs rate(a) and ASMR (f) for metabolic-related stroke by 5  
 444 SDI level during 1990-2019 in both genders.  
 445 b, g: Age-standardized DALYs rate(b) and ASMR (g) for metabolic-related stroke by  
 446 5 SDI level during 1990-2019 in female.  
 447 c, h: Age-standardized DALYs rate(c) and ASMR (h) for metabolic-related stroke by  
 448 5 SDI level during 1990-2019 in male.  
 449 d, i: Age-standardized DALYs rate (d) and ASMR (i) for metabolic-related stroke by  
 450 SDI around 204 countries during 1990-2019 in both genders.  
 451 e, j: AAPC of Age-standardized DALYs rate(e) and ASMR (j) for metabolic-related  
 452 stroke by SDI around 204 countries during 1990-2019 in both genders.



453 Figure 3: Mortality Rates and DALYs for Metabolic-Related Stroke by Age,  
 454 1990-2019

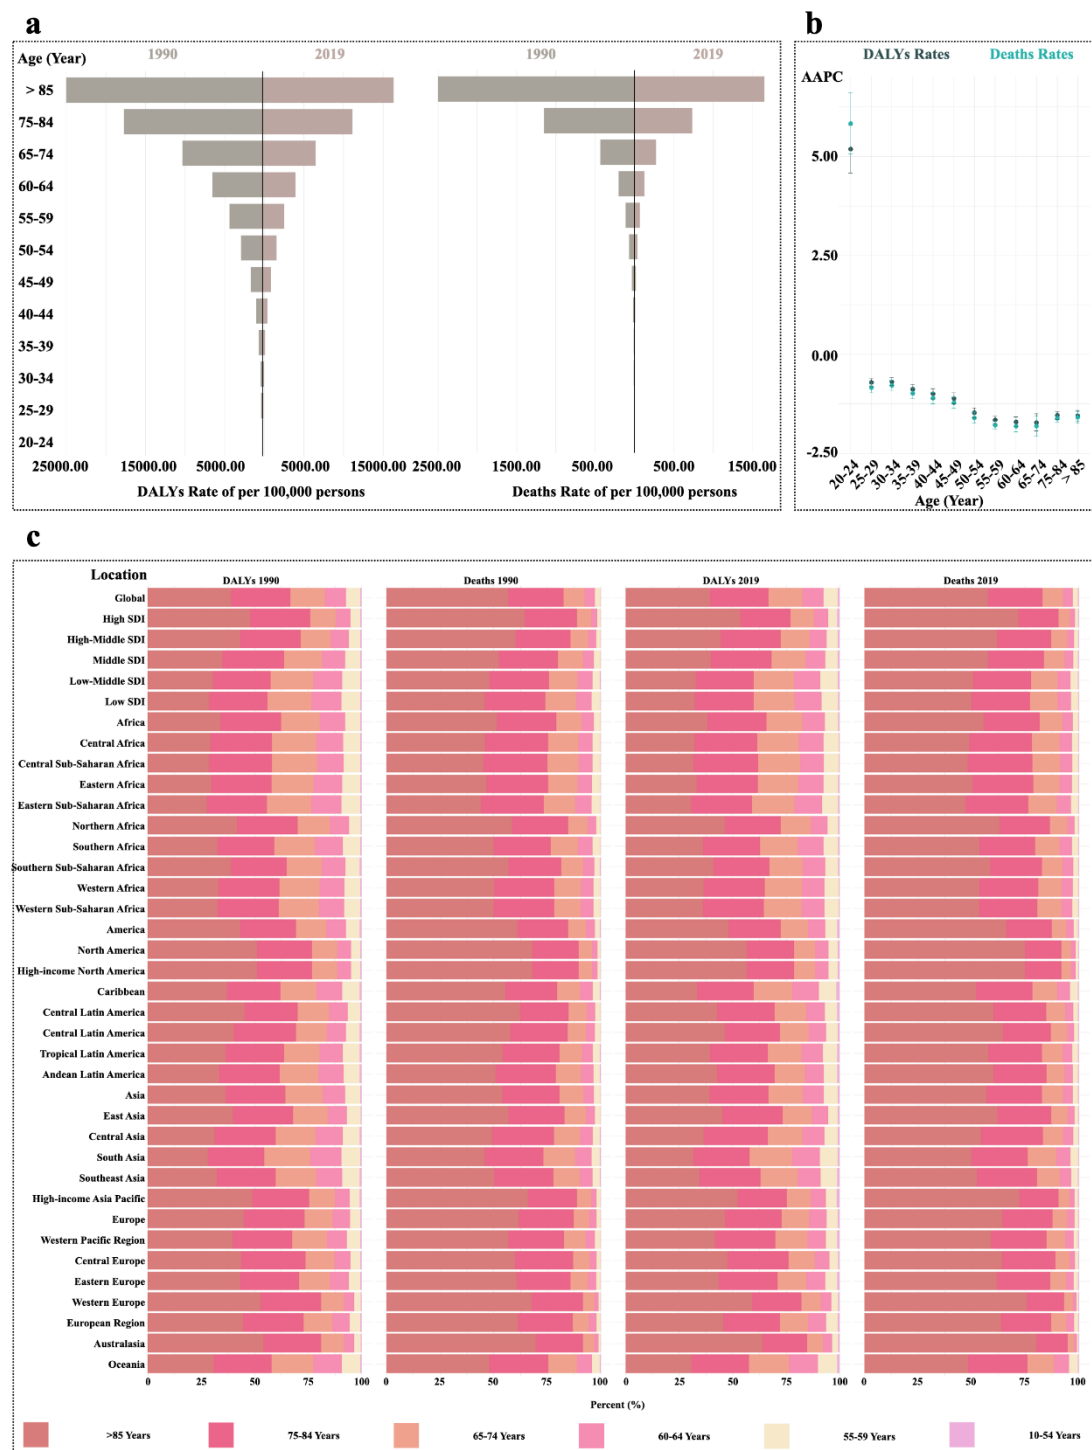

455

456 SDI: Socio-demographic Index; AAPC: Average Annual Percent Change. Death rate  
 457 of per 100,000 persons refers to the Age group special rate of deaths per 100,000  
 458 persons; DALYs rate of per 100,000 persons refers to the Age group special rate of  
 459 DALYs per 100,000 persons; AAPC: The Average Annual Percent Change between  
 460 1990 to 2019.



462 Figure 4: Mortality Rates and DALYs for Stroke by Risk Factors in 2019.

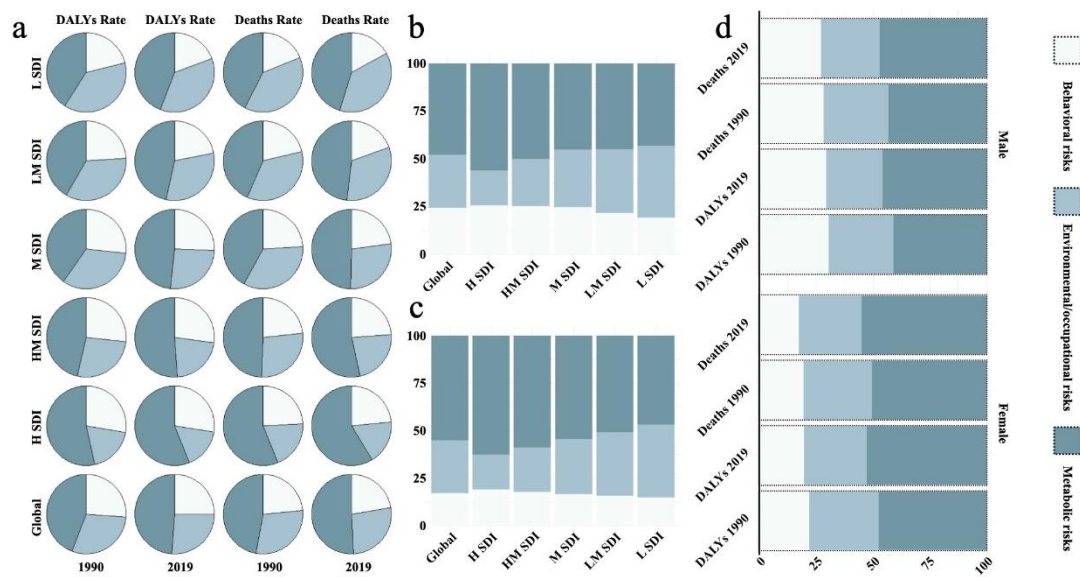

463

464 SDI: Socio-demographic Index; H SDI: High SDI; HM SDI: High-middle SDI; M  
 465 SDI: Middle SDI; LM SDI: Low-middle SDI; L SDI: Low SDI; DALYs rate: the  
 466 Age-Standardized Rate of DALYs per 100,000 persons; Deaths rate: the  
 467 Age-Standardized Rate of deaths per 100,000 persons.

468 a: The proportion of contributions from different risk factors to stroke varies across  
 469 years, SDI level, and outcome indicators.

470 b, c: The proportion of contributions from different risk factors to the ASMR of stroke  
 471 in 2019 varies across gender (b: male; c: female) and SDI level.

472 d: The proportion of contributions from different risk factors to stroke varies across  
 473 years, gender, and outcome indicators.

474

475 Figure 5: Mortality Rates and DALYs for Subgroup of Stroke in 1990 and 2019.

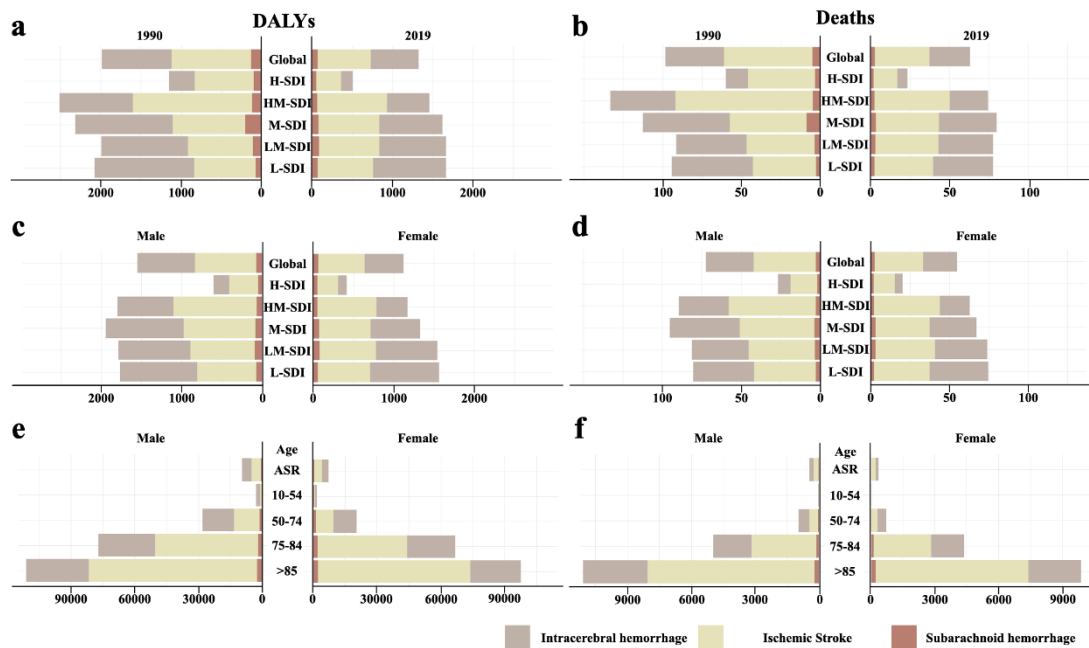

476

477 SDI: Socio-demographic Index; H SDI: High SDI; HM SDI: High-middle SDI; M  
 478 SDI: Middle SDI; LM SDI: Low-middle SDI; L SDI: Low SDI; DALYs rate: the  
 479 Age-Standardized Rate of DALYs per 100,000 persons; Deaths rate: the  
 480 Age-Standardized Rate of deaths per 100,000 persons.

481 a, b: The ASR of DALYs (a) and deaths (b) of stroke different subtypes varies across  
 482 years and SDI level.

483 c, d: The ASR of DALYs (c) and deaths (d) of stroke different subtypes in 2019 varies  
 484 across gender and SDI level.

485 e, f: The age specific rate of DALYs (e) and deaths (f) of stroke different subtypes  
 486 varies across gender and age group.

487

1990

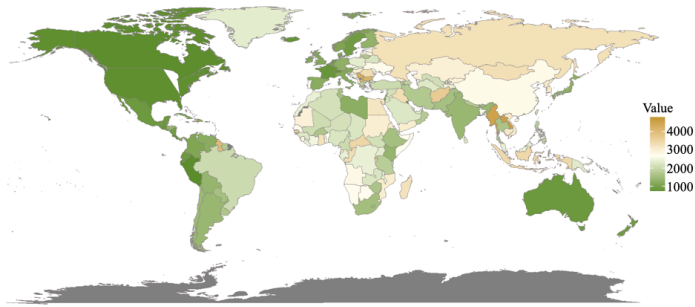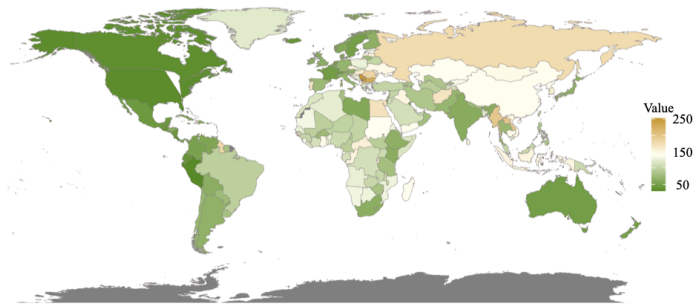

2019

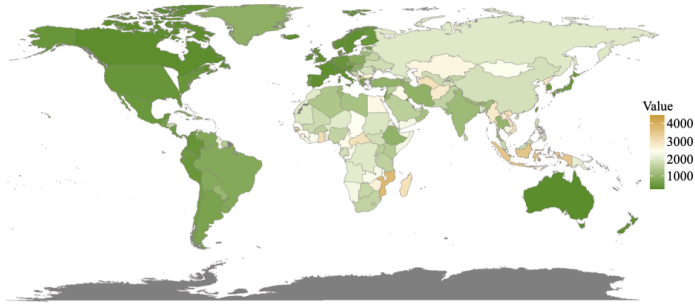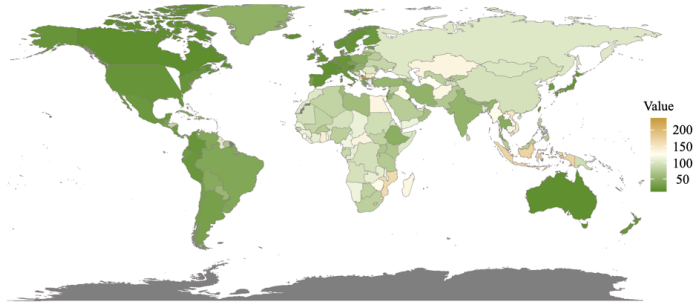

AAPC

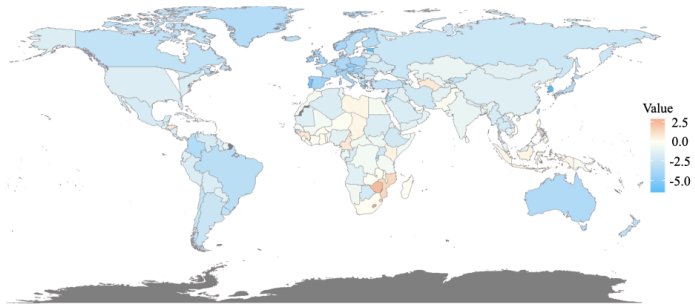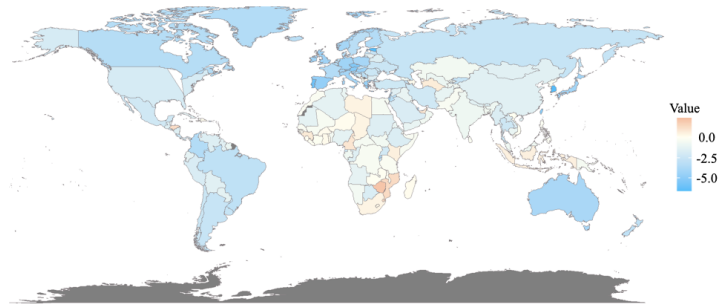

The ASRs of DALYs (per 100,000 persons)

The ASRs of Deaths (per 100,000 persons)

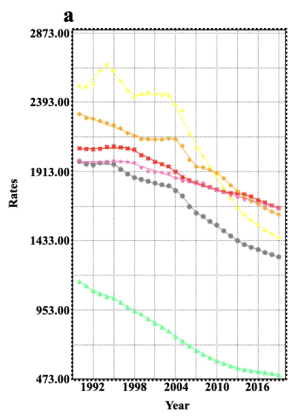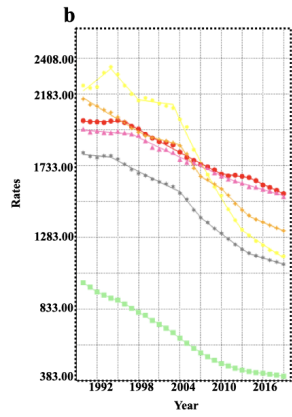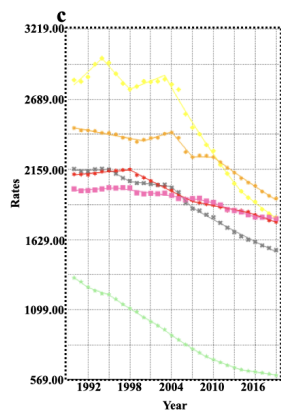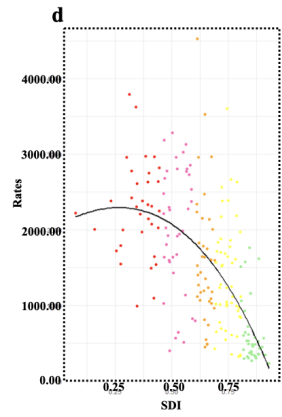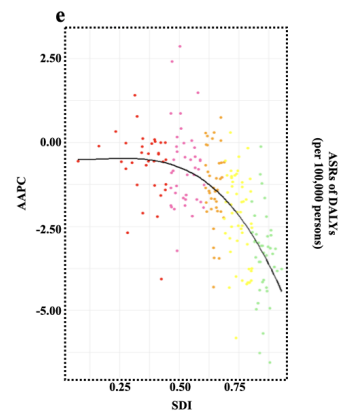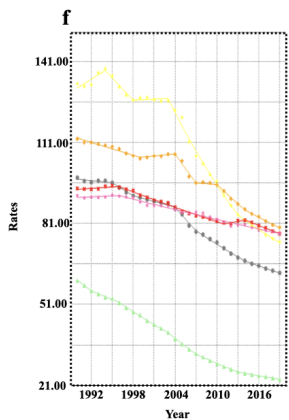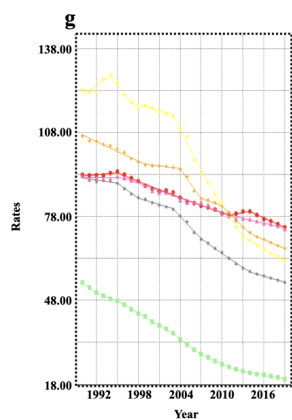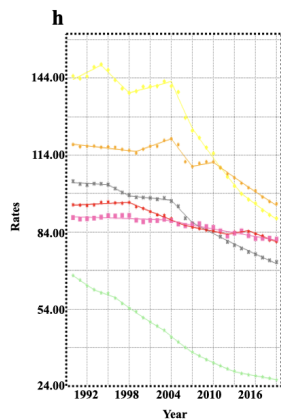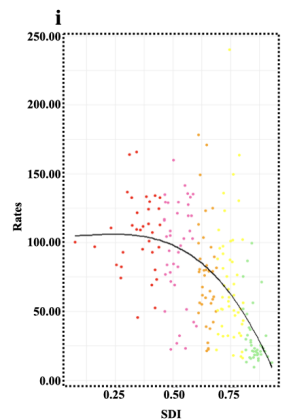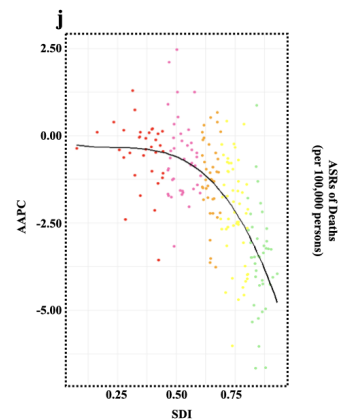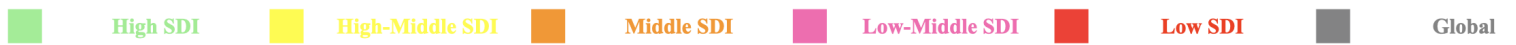

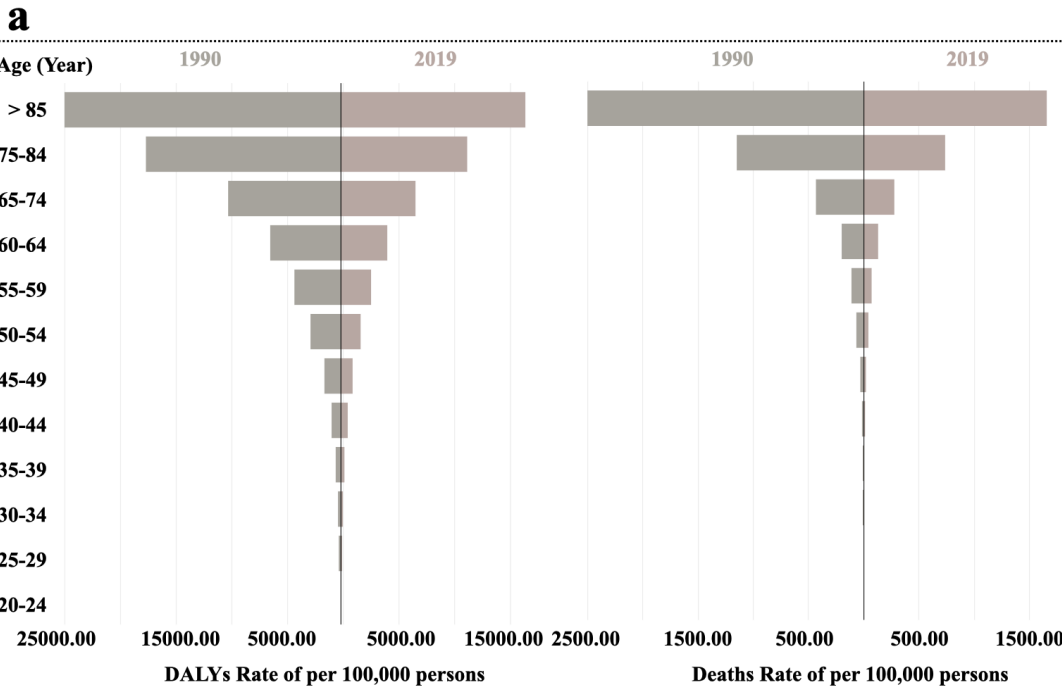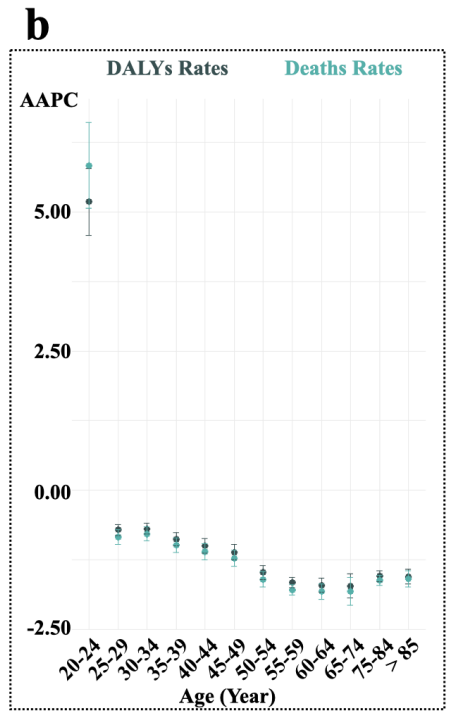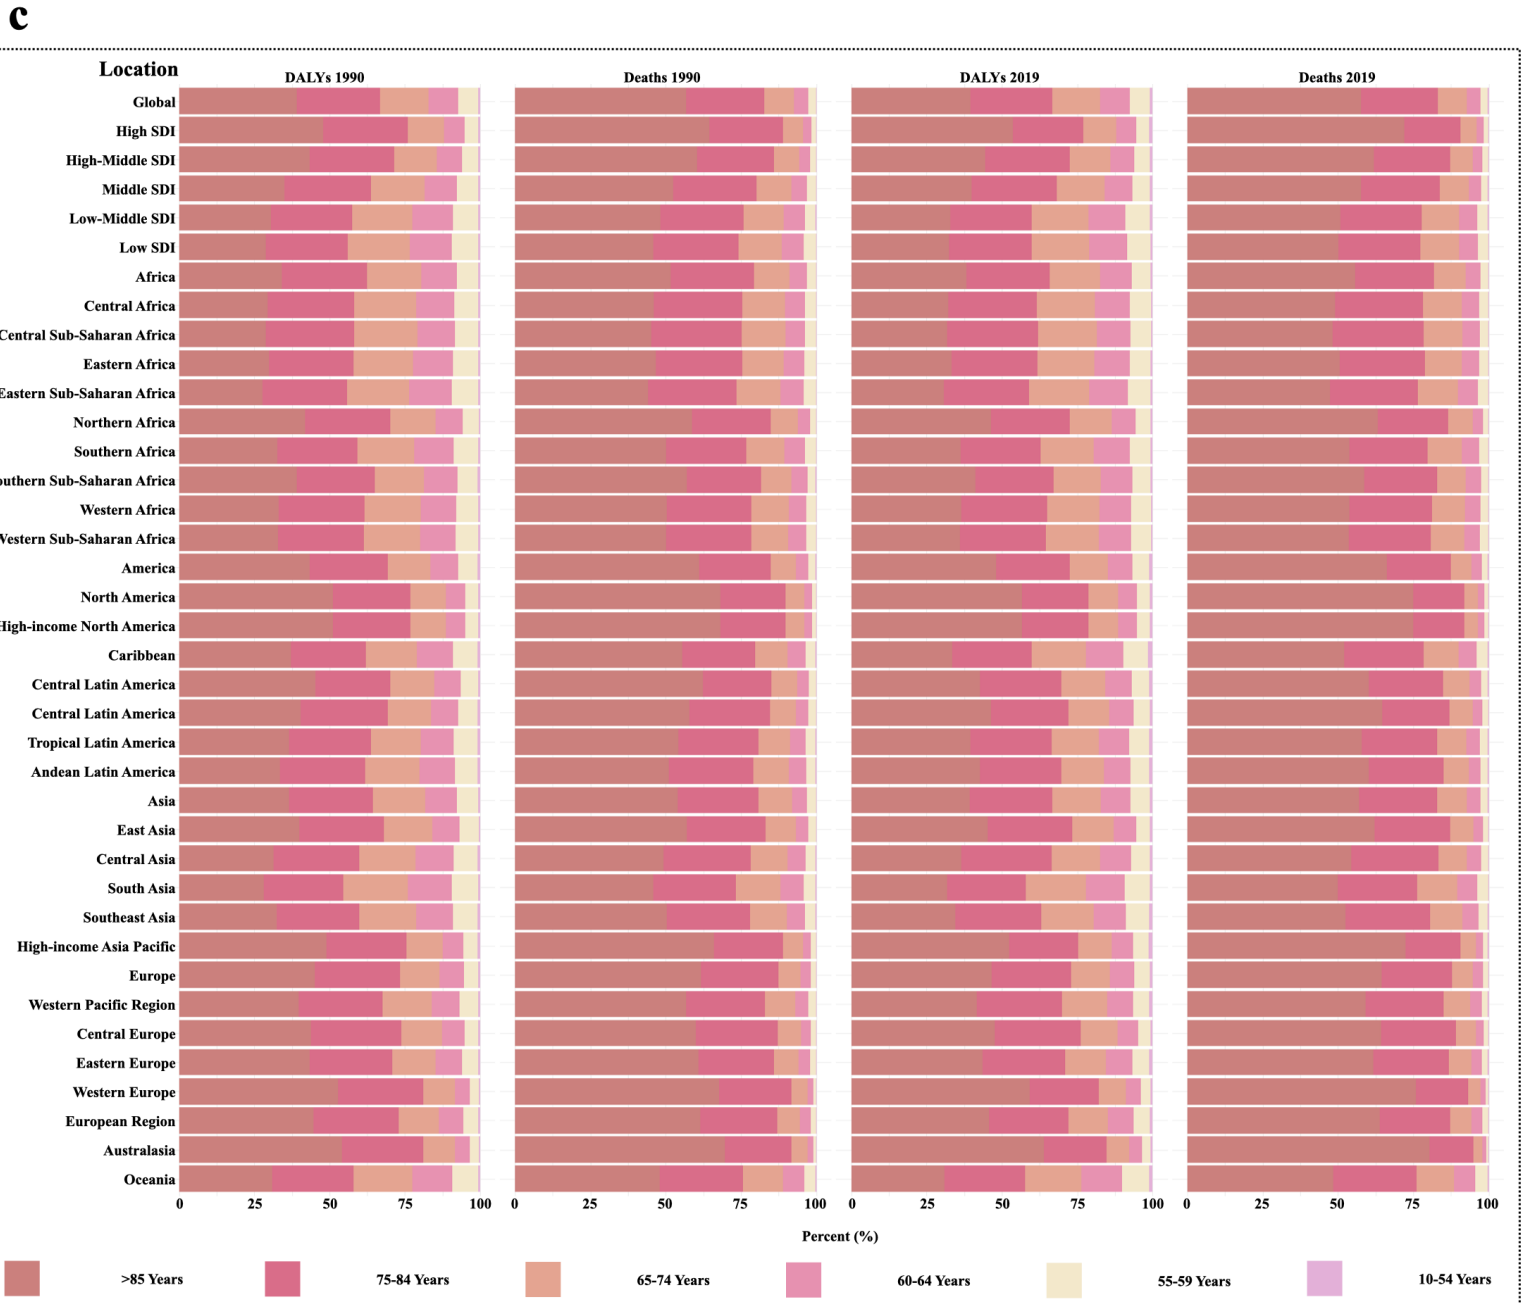

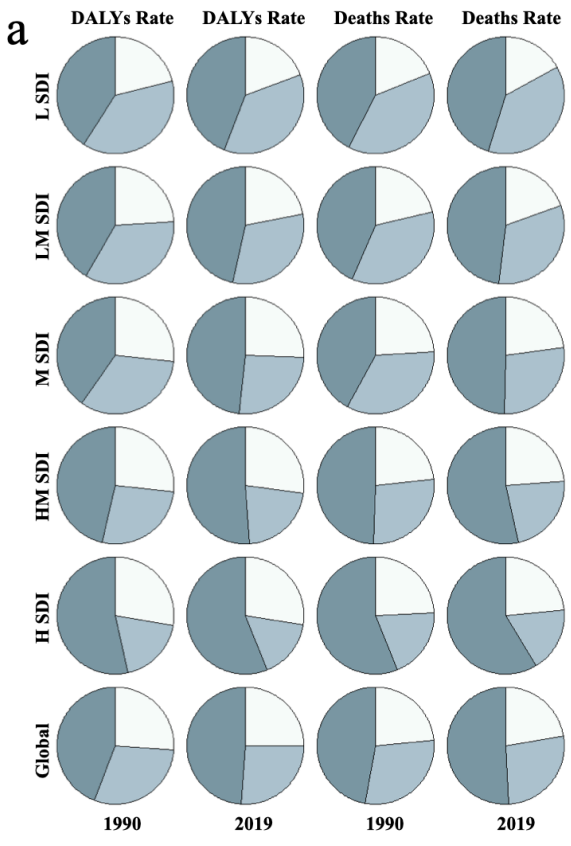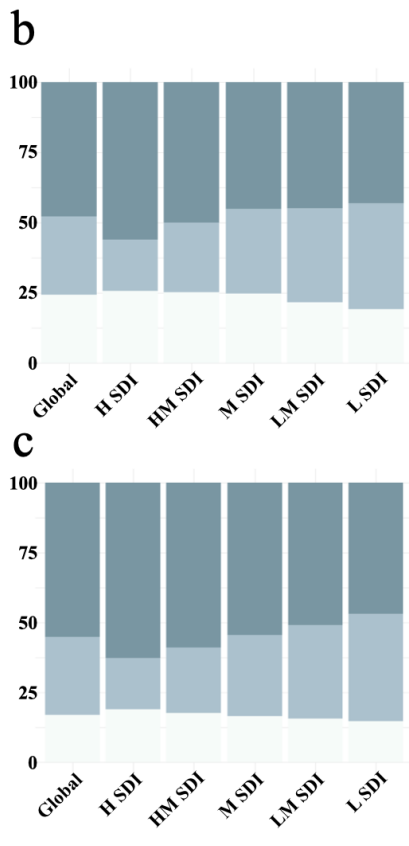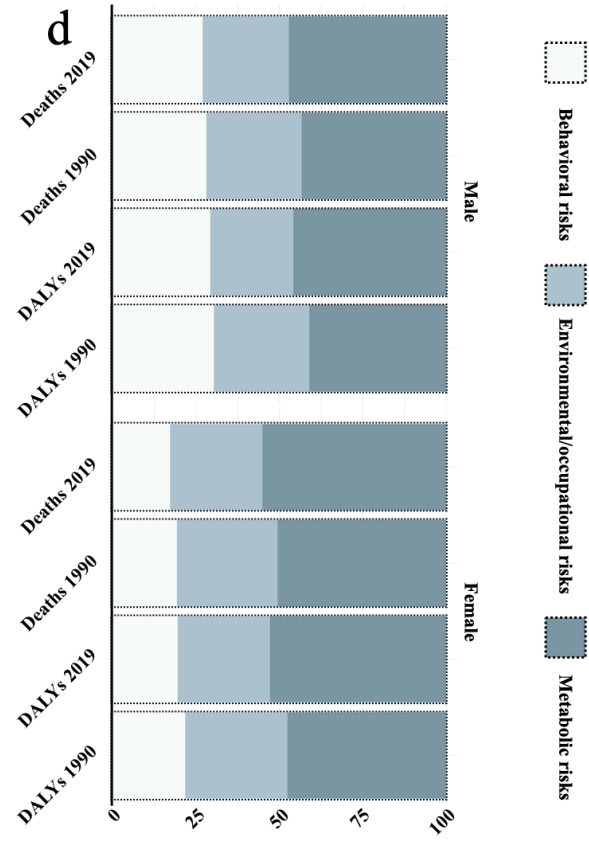



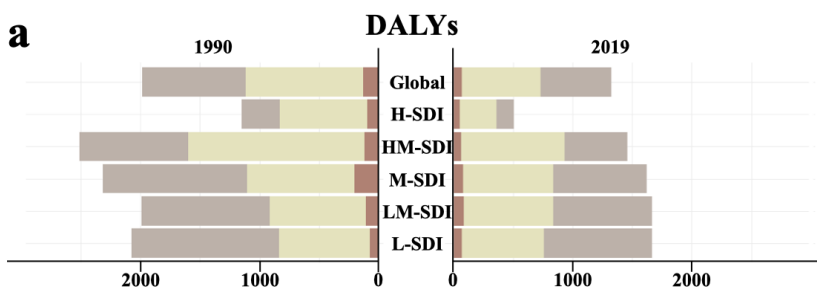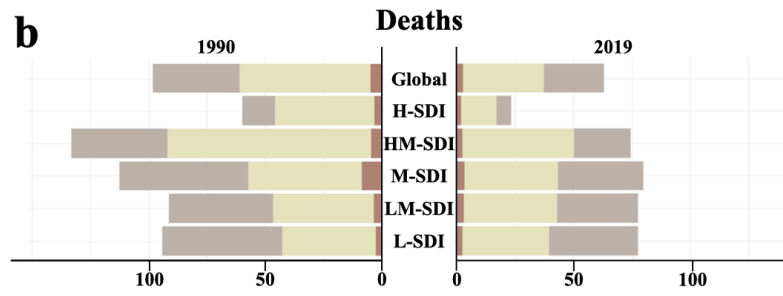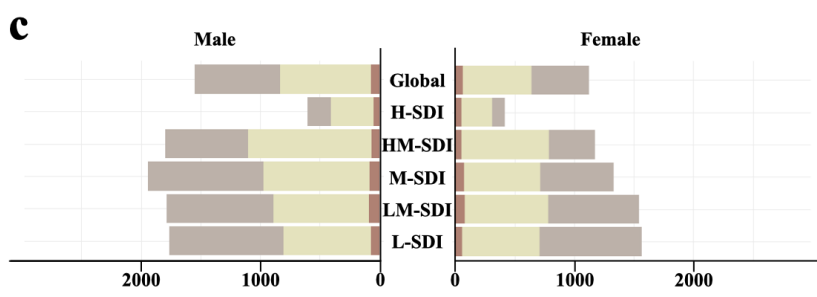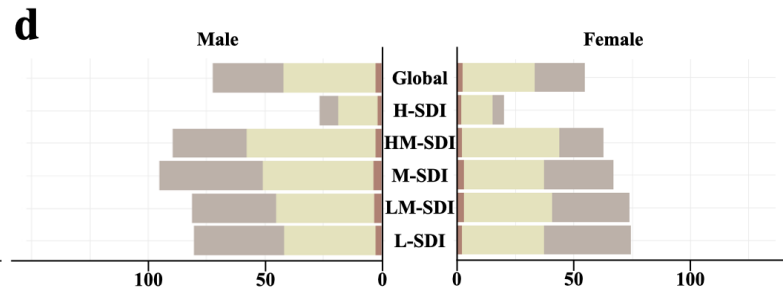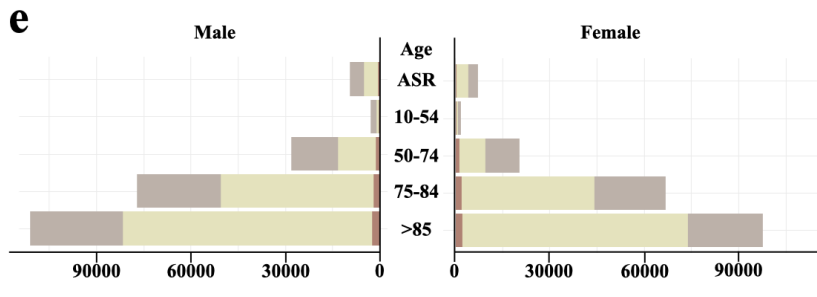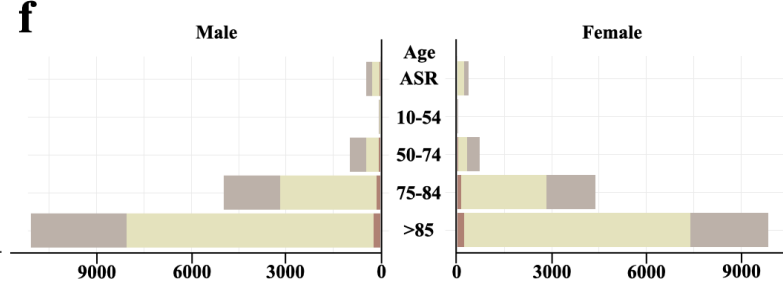

Intracerebral hemorrhage
  Ischemic Stroke
  Subarachnoid hemorrhage
